# Supplementary material
Source: publisher figshare collection journal article supplement (https://sage.figshare.com/ndownloader/files/24127736)
Supplement: Supplementary file 1 [file 24127736]

Supplementary A. Exclusions of CPT codes

| Description | CPT codes excluded |
| --- | --- |
| Non-elective | 10140, 11305, 20661, 22010, 22305, 22315, 22326, 22327 |
| Deformity | 22800, 22802, 22808, 22810, 22818 |
| Revision | 22830, 22862 |
| Osteotomy | 22210, 22216, 22220, 22222, 22224, 22226 |
| Laminectomy/laminotomy | 63001, 63003, 63005, 63015, 63020, 63030, 63035, 63040, 63042, 63045, 63046, 63047, 63048, 63050, 63051, 63265, 63266, 63267, 36281 |
| Intraspinal lesion | 63272, 63276, 63300, 63301, 63304, 63308 |
| Arthrodesis | 22532, 22534, 22548, 22558, 22590, 22600, 22610, 22612, 22614, 22630, 22632, 22634, 63101, 63085, 63087, 63091 |
| Other posterior procedures | 63056, 63090, 63102 |
